# Supplementary material for: One-pot synthesis of PrPO4 nanorods–reduced graphene oxide composites and their photocatalytic properties
Source: Royal Society of Chemistry journal article supplement (doi:10.1039/c3nj01261a), 2014-01-01
Supplement: c3nj01261a1.pdf [file c3nj01261a1.pdf]

## Supporting Information

### **One-pot synthesis of PrPO<sub>4</sub> nanorods/reduced graphene oxide composites and their photocatalytic properties**

Hongwei Lv,<sup>a</sup> Xiaoping Shen,<sup>a,\*</sup> Zhenyuan Ji,<sup>b</sup> Kangmin Chen,<sup>b</sup> Guoxing Zhu<sup>a</sup>

<sup>a</sup> *School of Chemistry and Chemical Engineering, Jiangsu University,  
Zhenjiang 212013, P. R. China*

<sup>b</sup> *School of Materials Science and Engineering, Jiangsu University, Zhenjiang  
212013, P. R. China*

**\*Corresponding Author: Fax: (+86)511-88791800; Tel: (+86)511-88791800; E-mail: [xiaopingshen@163.com](mailto:xiaopingshen@163.com) (X. P. Shen).**

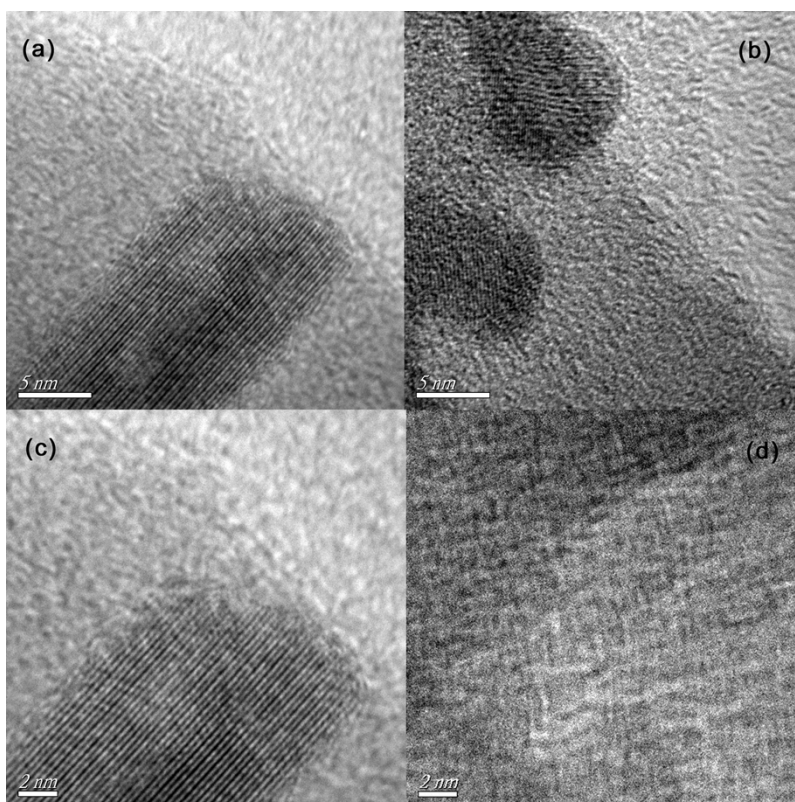

**Fig. S1** HRTEM images of PrPO<sub>4</sub>/RGO nanocomposite.

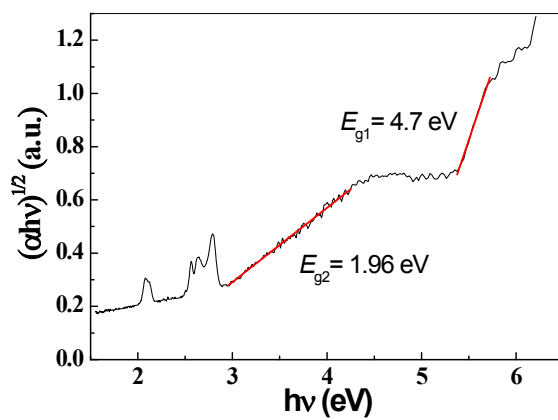

**Fig. S2**  $(\alpha h\nu)^{1/2}$  vs.  $h\nu$  curve deriving from UV-vis spectra of PrPO<sub>4</sub> nanorods.

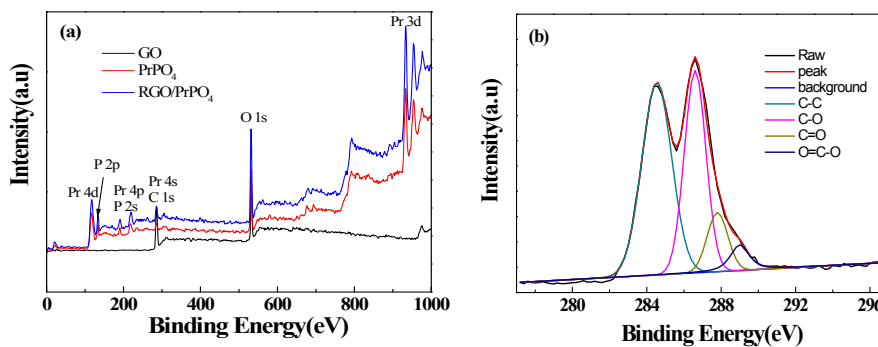

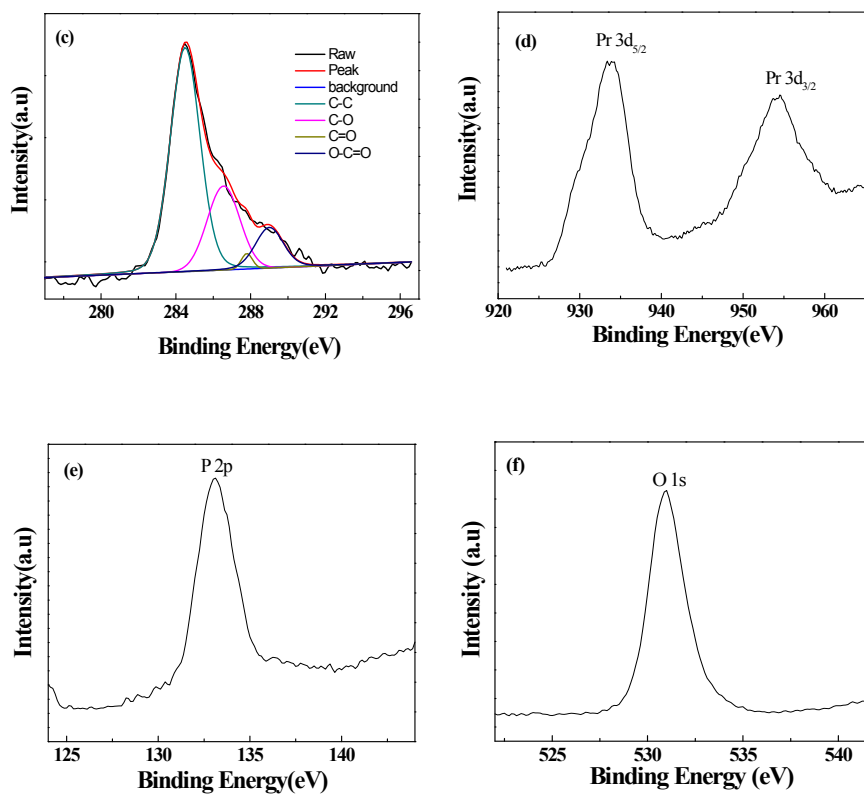

**Fig. S3** (a) XPS spectra of GO, PrPO<sub>4</sub> and PrPO<sub>4</sub>/RGO; (b) and (c) C 1s XPS spectra of GO and PrPO<sub>4</sub>/RGO, respectively; (d)-(f) Pr 3d, P 2p and O 1s regions, respectively.

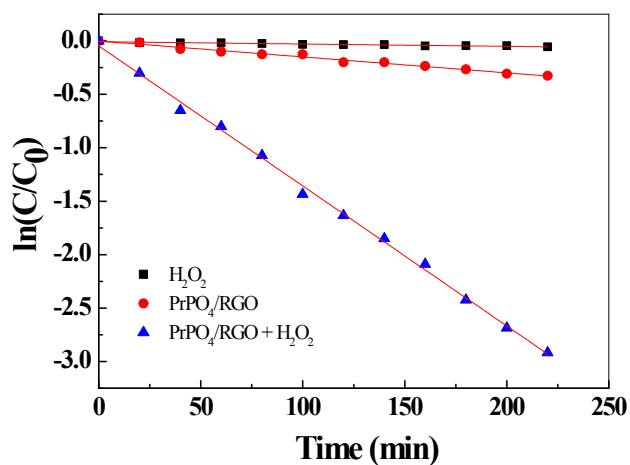

**Fig. S4** Plots of  $\ln(C/C_0)$  versus irradiation time.

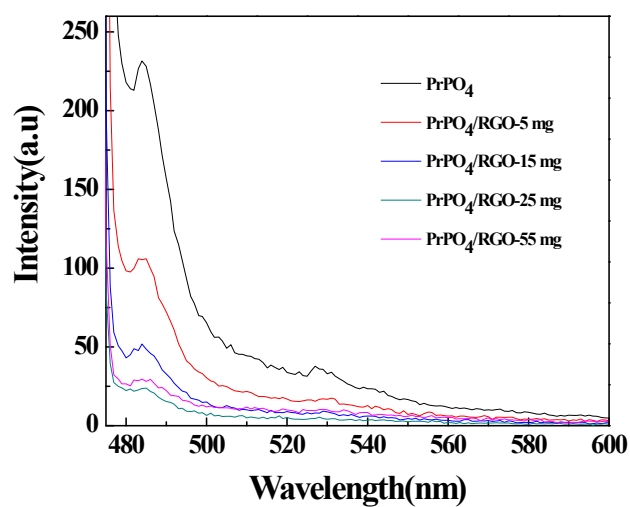

**Fig. S5** The room temperature photoluminescence (PL) spectra of PrPO<sub>4</sub> and PrPO<sub>4</sub>/RGO nanocomposites with different graphene content ( $\lambda_{\text{ex}} = 468 \text{ nm}$ ).

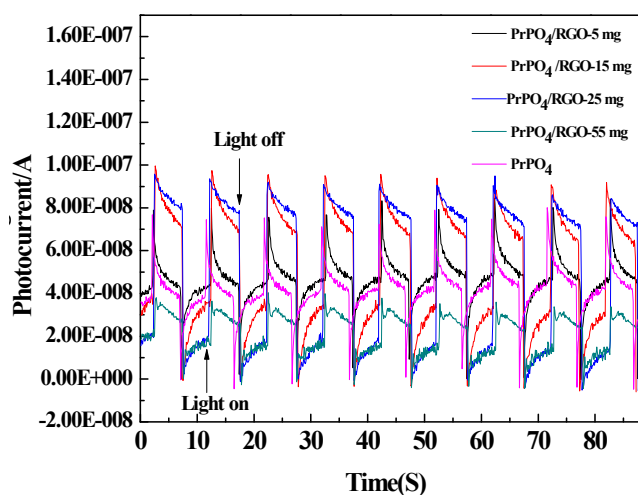

**Fig. S6** Photocurrent response of PrPO<sub>4</sub>, and PrPO<sub>4</sub>/RGO nanocomposites with different amount of RGO.

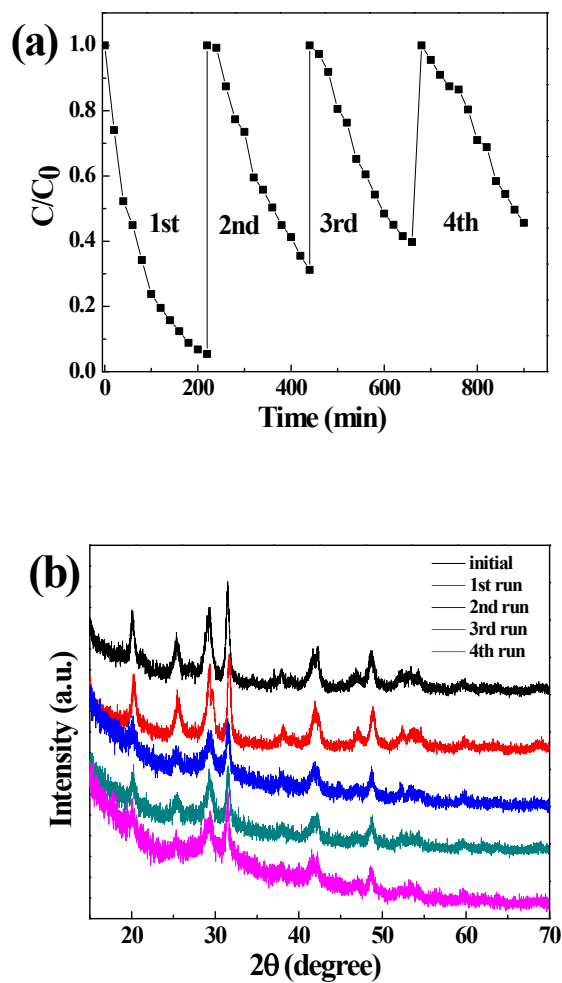

**Fig. S7** (a) Repeated photocatalytic degradation of MB with  $\text{PrPO}_4/\text{RGO}$ -25mg nanocomposite as a photocatalyst; (b) XRD patterns of  $\text{PrPO}_4/\text{RGO}$ -25mg nanocomposites after photocatalytic reaction and different cycling runs.

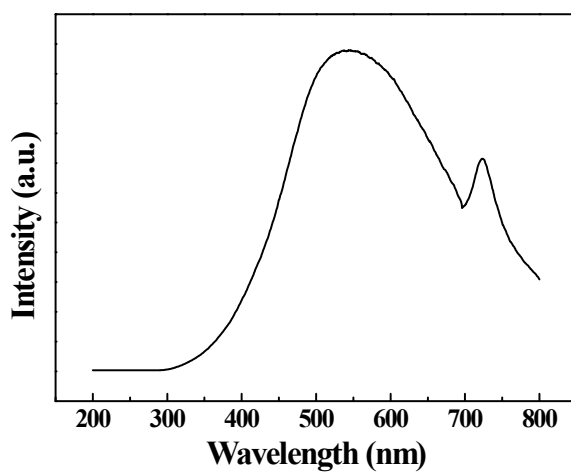

**Fig. S8** The output wavelength spectrum of tungsten lamp.

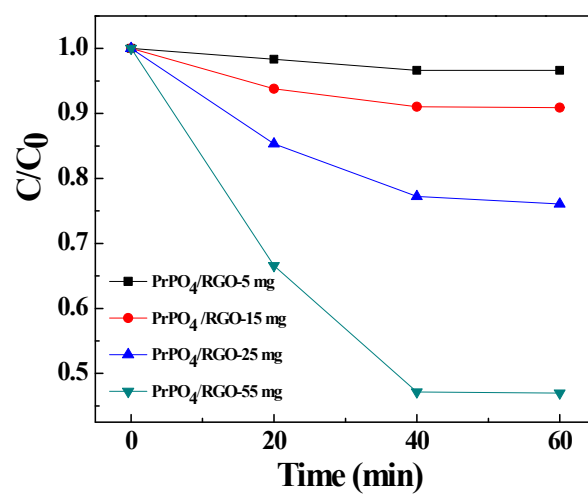

**Fig. S9** The adsorption-desorption equilibrium experiment of PrPO<sub>4</sub>/RGO nanocomposites with different graphene content.
